# Supplementary material for: Characterization of Equine Infectious Anemia Virus Integration in the Horse Genome
Source: Viruses. 2015 Jun 19;7(6):3241–60. doi: 10.3390/v7062769 (PMC4488736; doi:10.3390/v7062769)
Supplement: Supplementary File 1 [file viruses-07-02769-s001.pdf]

# Supplementary Information

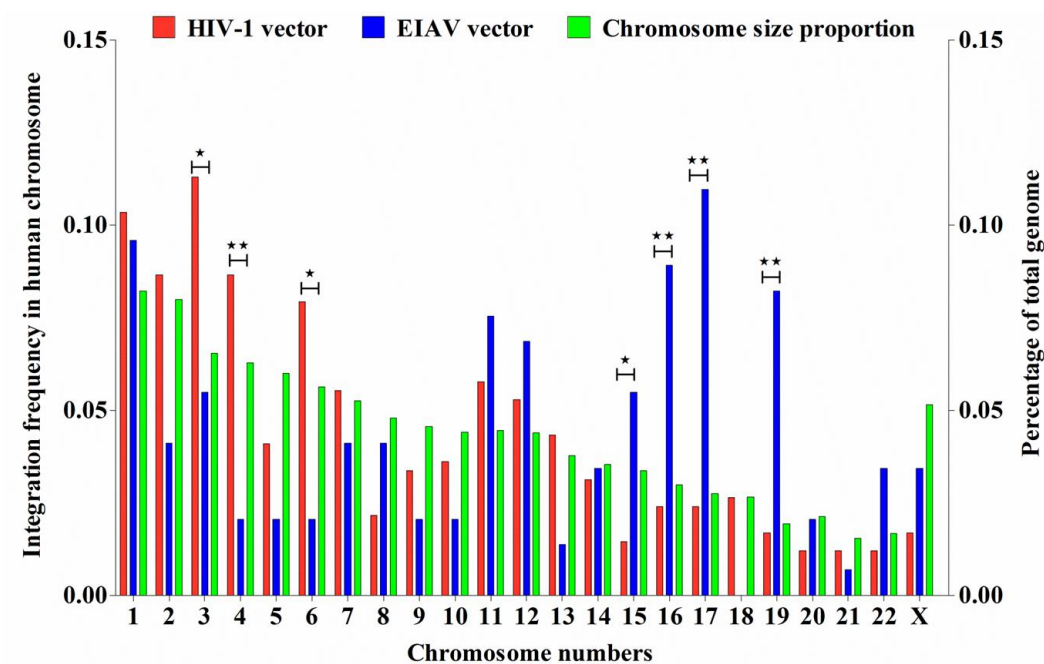

**Figure S1.** Chromosome distribution of viral integration sites of HIV-1 and EIAV transfection vectors in human chromosomes (146 and 416 sites, respectively). The integration sites were cited from GenBank and re-analyzed using the updated human genomic database (UCSC, assembled in December 2013). The proportion of integration sites in human chromosomes is indicated as a percentage, which is compared with the percentage of each corresponding chromosome size based on the length of the whole human genome. The chi-squared test was used.

**A**

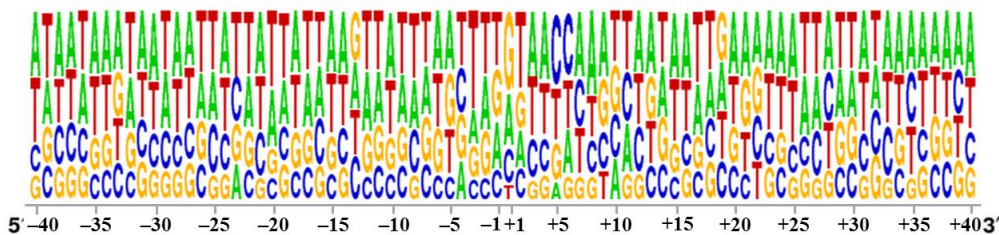

**B**

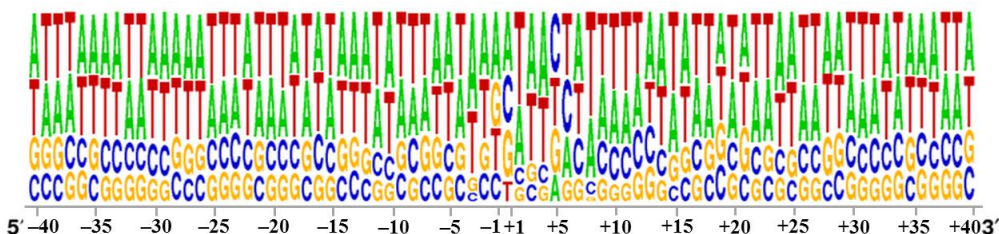

**Figure S2.** Base frequency within 40 bp around the integration sites of HIV-1 and EIAV transfection vectors in the human chromosome. (A) Base frequency of HIV-1 vector integration sites. (B) Base frequency of EIAV vector integration sites. The diagrams were generated using the WebLOGO program (available online: <http://weblogo.berkeley.edu/>). The relative length of four nucleotides on the Y-axis represents the frequency of each base.

**Table S1.** PCR primer sequences.

| Name                 | Primer sequence (From 5' to 3')           |
|----------------------|-------------------------------------------|
| AD-L                 | CTAATACGAGTCACTATAGCGCTCGAGCGGCCCGGGGAGGT |
| AD-S                 | PO <sub>4</sub> -ACCTCCCC-NH <sub>2</sub> |
| APF1                 | GGATCCTAATACGAGTCACTATAGCGC               |
| EIAV514 <sup>a</sup> | CTTTTGAGACCCTTGTACCGTCACCTT               |
| APF2                 | CTATAGCGCTCGAGCGGC                        |
| EIAV359 <sup>b</sup> | GGTTCAGCAGGCAGGGTCT                       |

a/b: Primer sequences were designed according to the EIAV complete genome (GenBank: AF327877).

**Table S2.** Correlation between repeat elements and integration sites in the human genome.

|                    | Random control       | HIV vector |                        | EIAV vector |                        |                        |
|--------------------|----------------------|------------|------------------------|-------------|------------------------|------------------------|
|                    | No. (%) <sup>a</sup> | No. (%)    | <i>PI</i> <sup>c</sup> | No. (%)     | <i>PI</i> <sup>c</sup> | <i>P2</i> <sup>d</sup> |
| Total <sup>b</sup> | 4647                 | 81         |                        | 160         |                        |                        |
| LINEs              | 1869 (40.2)          | 21 (25.9)  | **                     | 60 (37.5)   | NS                     | NS                     |
| SINEs              | 1292 (27.8)          | 40 (49.4)  | **                     | 58 (36.3)   | *                      | 0.05                   |
| DNA transposons    | 310 (6.7)            | 4 (4.9)    | NS                     | 20 (12.5)   | **                     | NS                     |
| LTR transposons    | 824 (17.7)           | 10 (12.3)  | NS                     | 19 (11.9)   | NS                     | NS                     |

a: Percentages of repetitive elements in the host genome were based on the total numbers of integration sites inserted into repetitive elements in the random control; b: The number of integration sites inserted into the repetitive elements was calculated based on the human genome; c: *PI* displays a comparison of the frequency of corresponding repetitive elements in the random control using the chi-squared test; d: *P2* presents a comparison with HIV-1 vector group integration using the chi-squared test. NS indicates not significant; \* indicates significant, *i.e.*,  $p < 0.05$ ; \*\* indicates very significant, *i.e.*,  $p < 0.01$ .
